# Supplementary material for: Açai (Euterpe oleracea Mart.) Seed Extract Induces ROS Production and Cell Death in MCF-7 Breast Cancer Cell Line
Source: MDPI journal article supplement (doi:10.3390/molecules26123546), 2021-06-10
Supplement: s1 [file s1]

## Supplementary Data

### Chemical compounds identified by GNPS hits

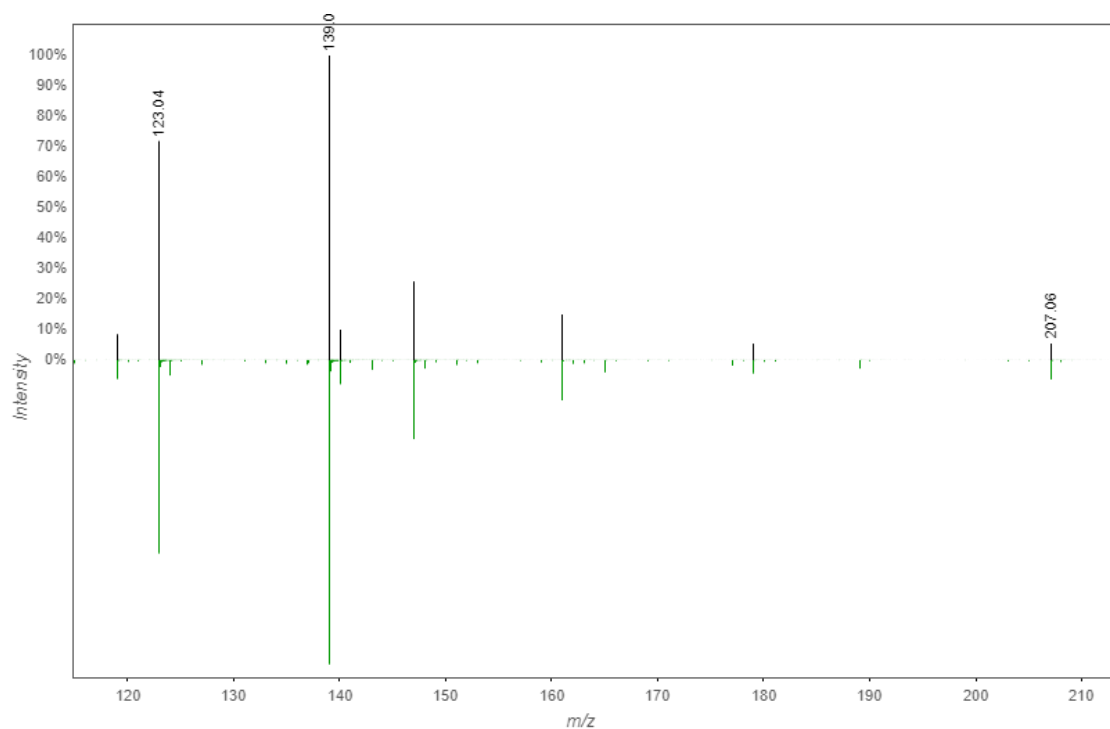

**Fig S1.** MS/MS match between GNPS database (green) and *Euterpe oleracea* Mart extract (black) for **1**.

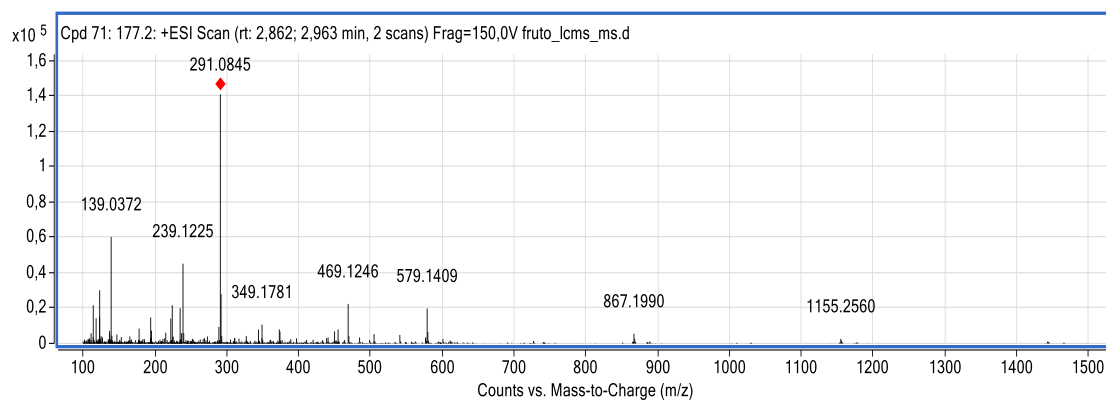

**Fig S2.** Mass Spectrum of  $[M+H]^+$  of **1**.

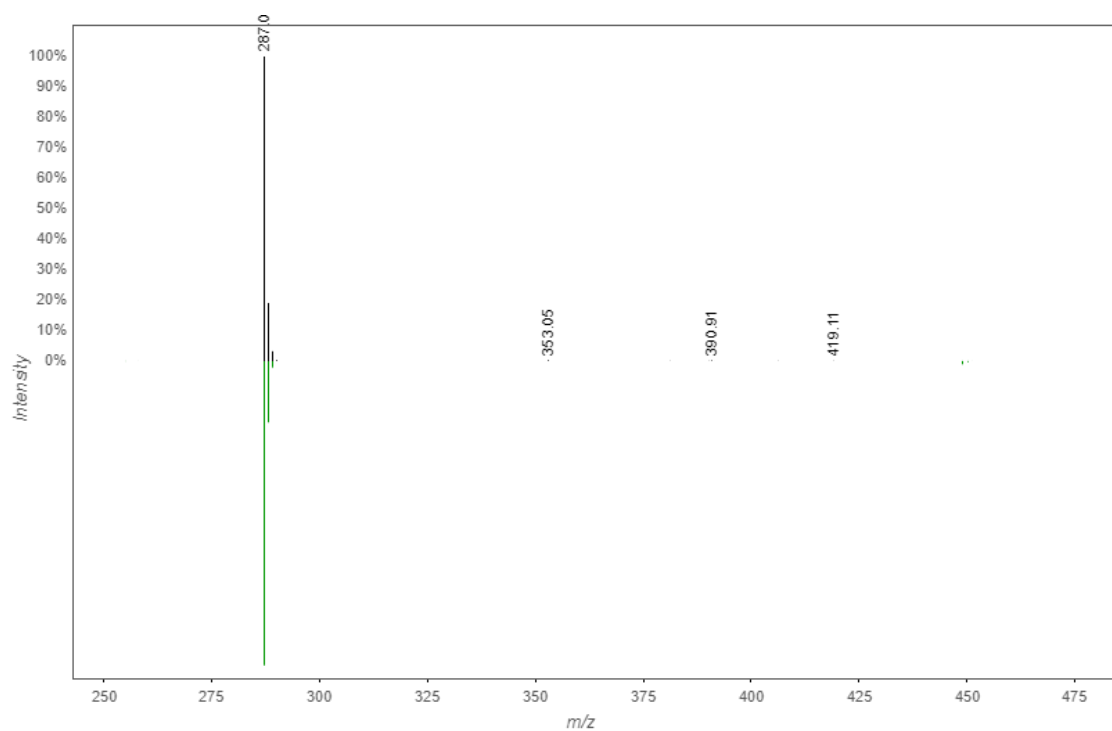

**Fig S3.** MS/MS match between GNPS database (green) and *Euterpe oleracea* Mart extract (black) for **2**.

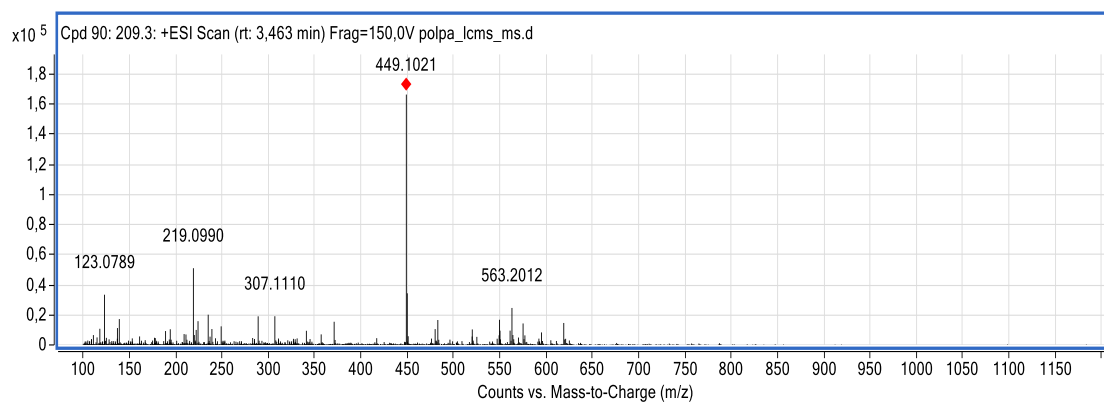

**Fig. S4.** Mass Spectrum of  $[M+H]^+$  of **2**

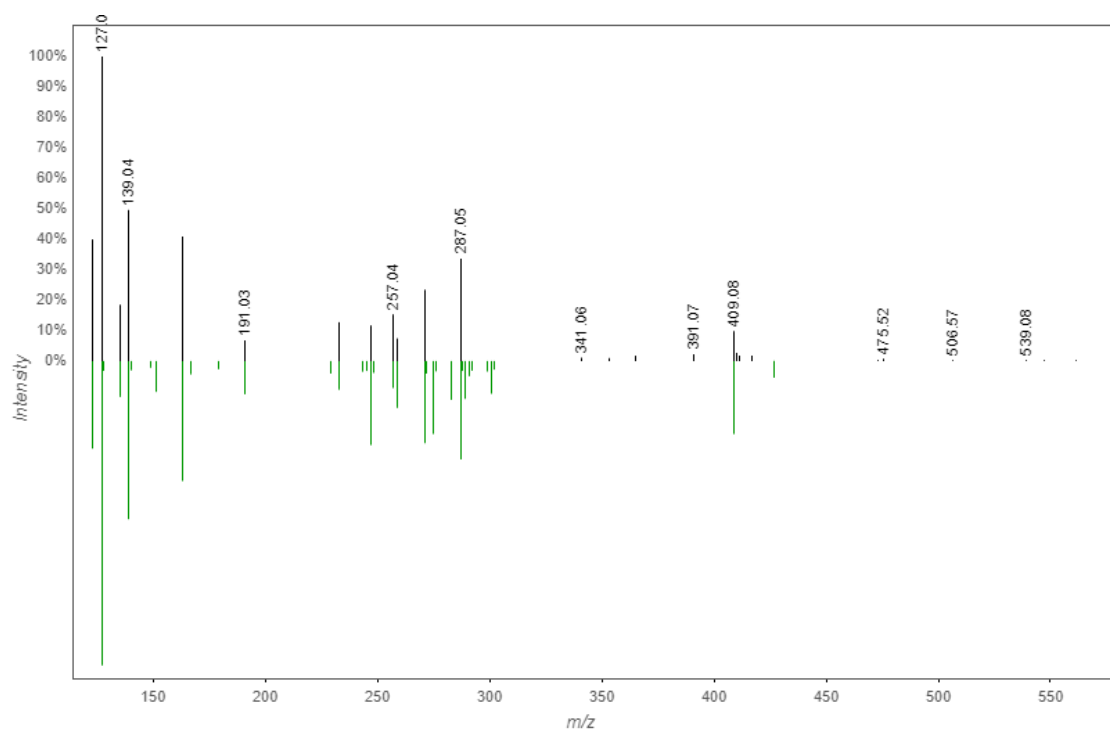

**Fig S5.** MS/MS match between GNPS database (green) and *Euterpe oleracea* Mart extract (black) for **3**.

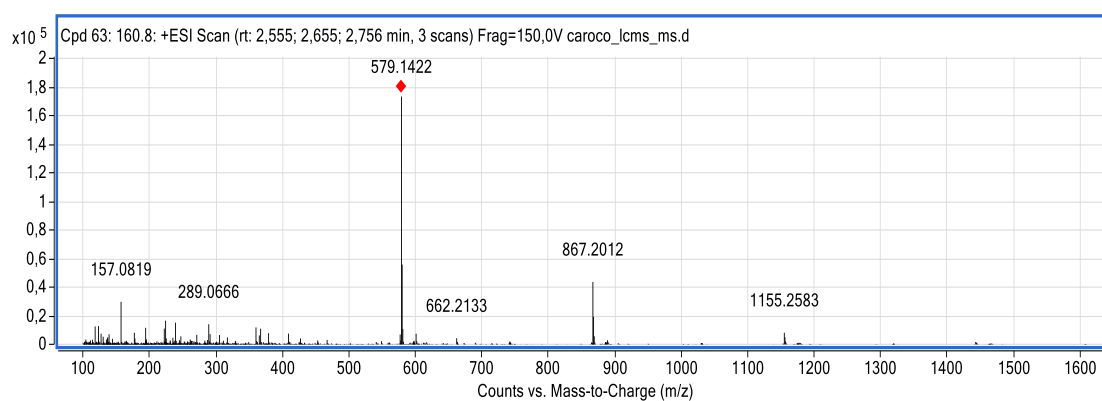

**Fig. S6.** Mass Spectrum of [M+H]<sup>+</sup> of **3**

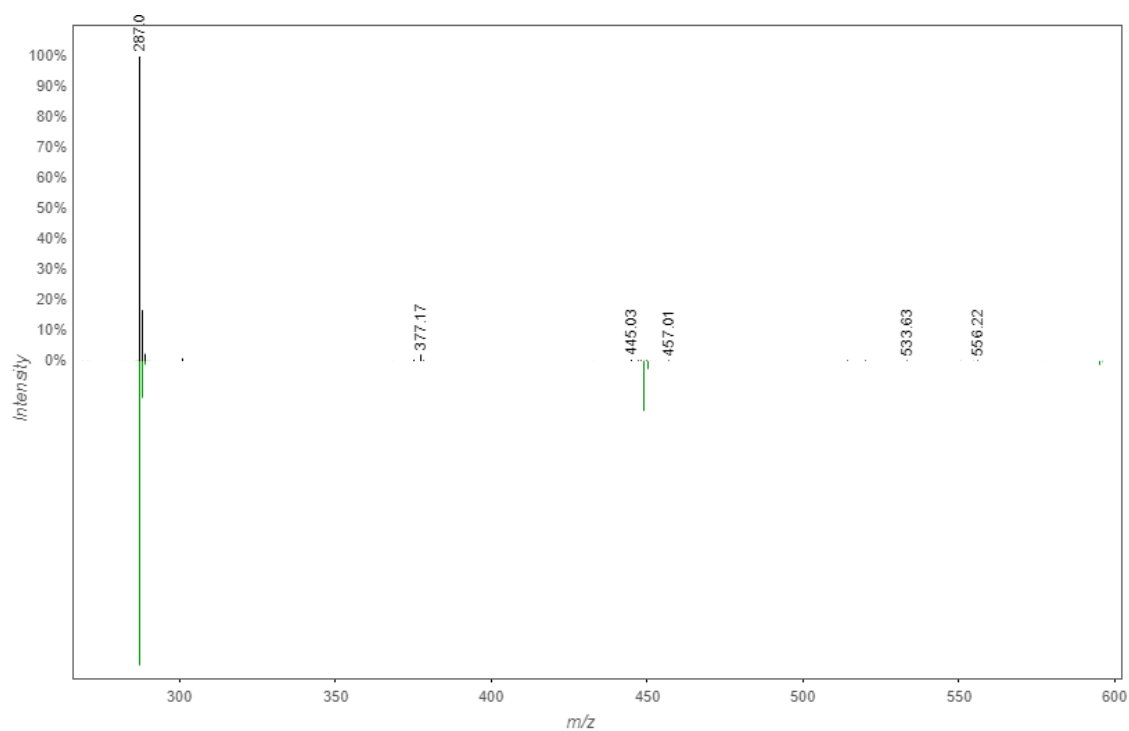

**Fig S7.** MS/MS match between GNPS database (green) and *Euterpe oleracea* Mart extract (black) for **4**.

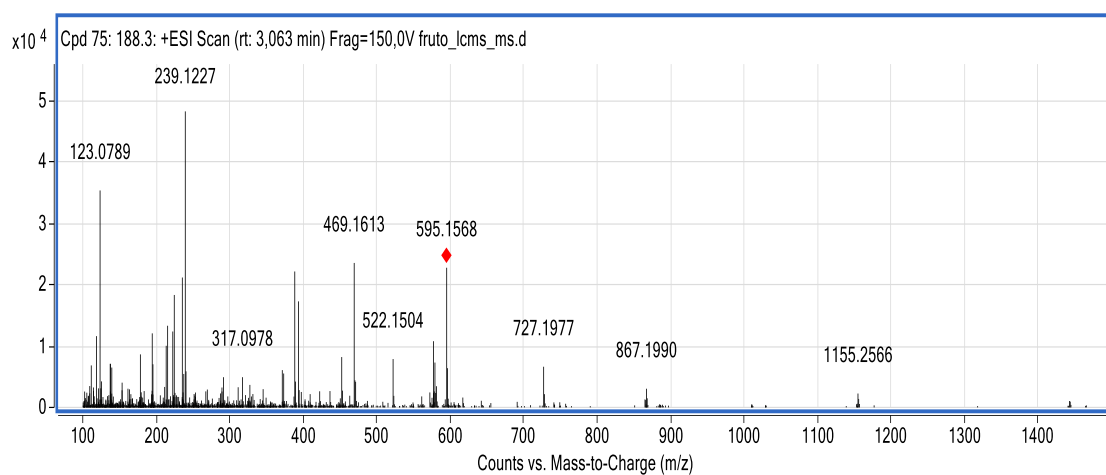

**Fig. S8.** Mass Spectrum of  $[M+H]^+$  of **4**

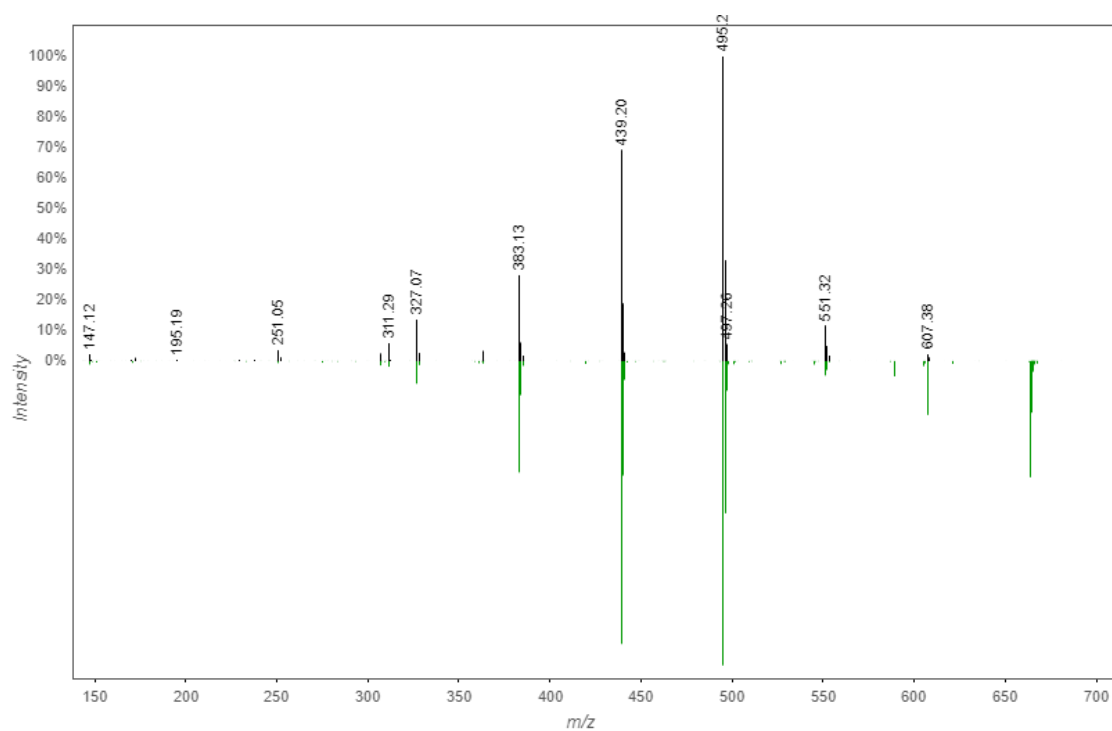

**Fig S9.** MS/MS match between GNPS database (green) and *Euterpe oleracea* Mart extract (black) for **5**.

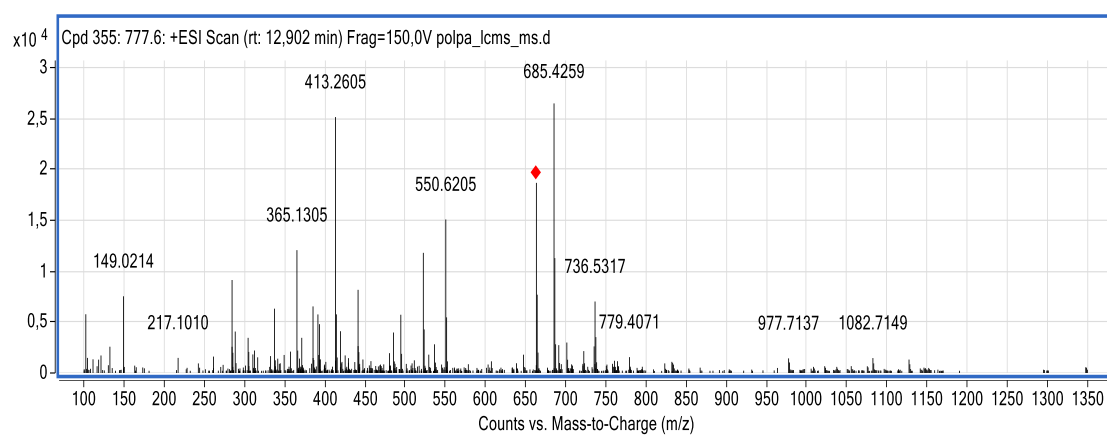

**Fig. S10.** Mass Spectrum of  $[M+H]^+$  of **5**

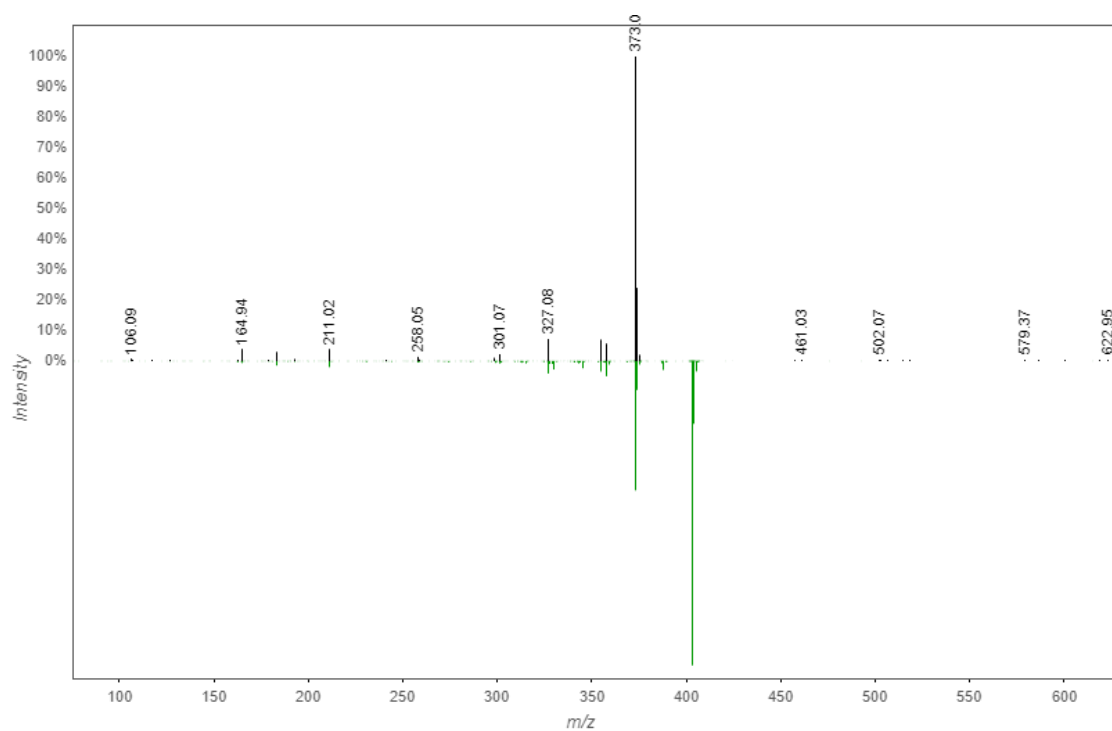

**Fig S11.** MS/MS match between GNPS database (green) and *Euterpe oleracea* Mart extract (black) for **6**.

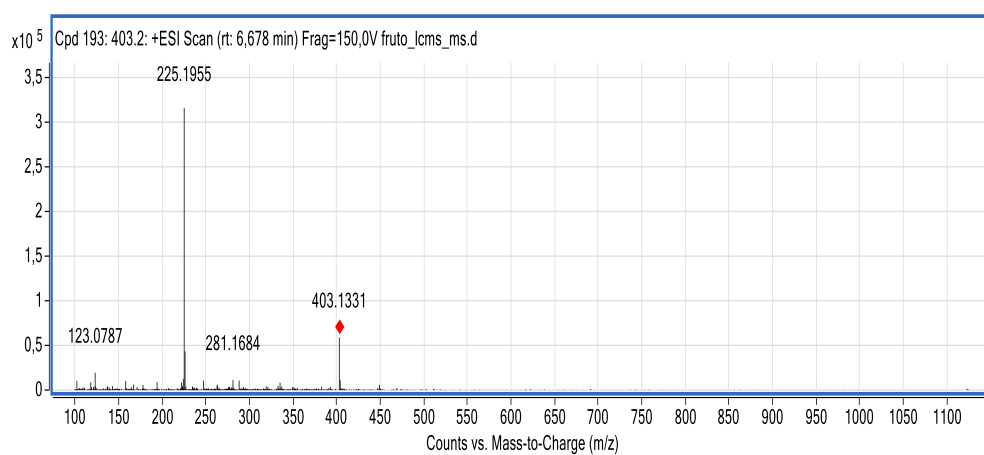

**Fig. S12.** Mass Spectrum of  $[M+H]^+$  of **6**

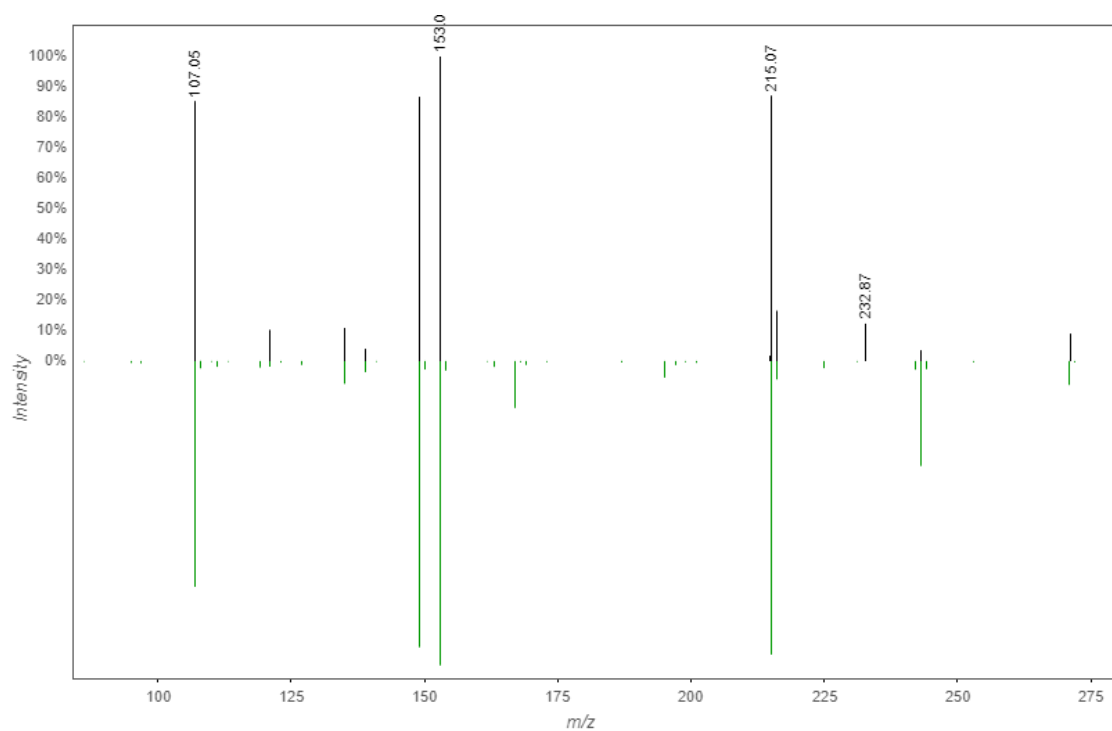

**Fig S13.** MS/MS match between GNPS database (green) and *Euterpe oleracea* Mart extract (black) for **7**.

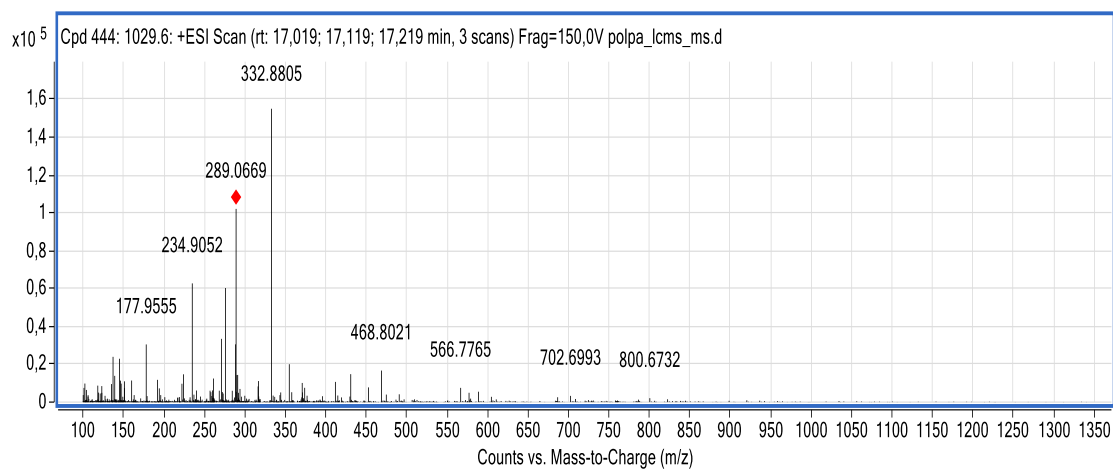

**Fig. S14.** Mass Spectrum of  $[M+H]^+$  of **7**

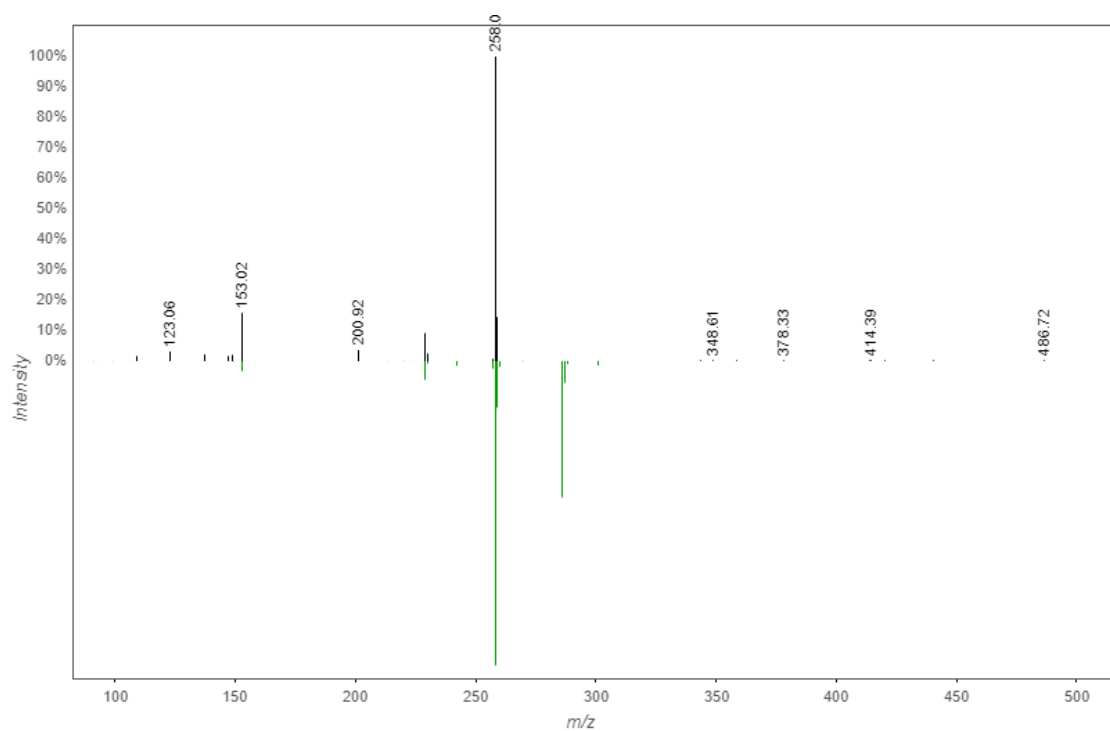

**Fig S15.** MS/MS match between GNPS database (green) and *Euterpe oleracea* Mart extract (black) for **8**.

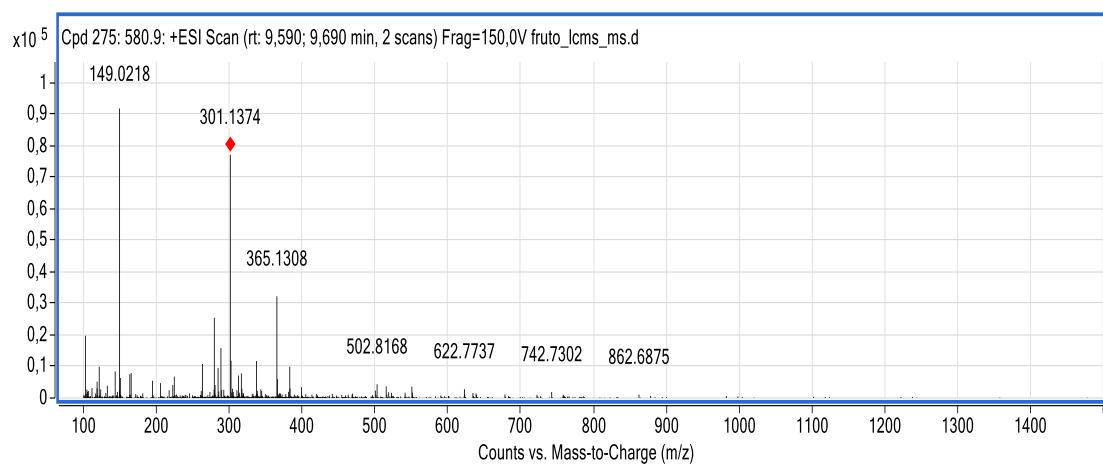

**Fig. S16.** Mass Spectrum of  $[M+H]^+$  of **8**



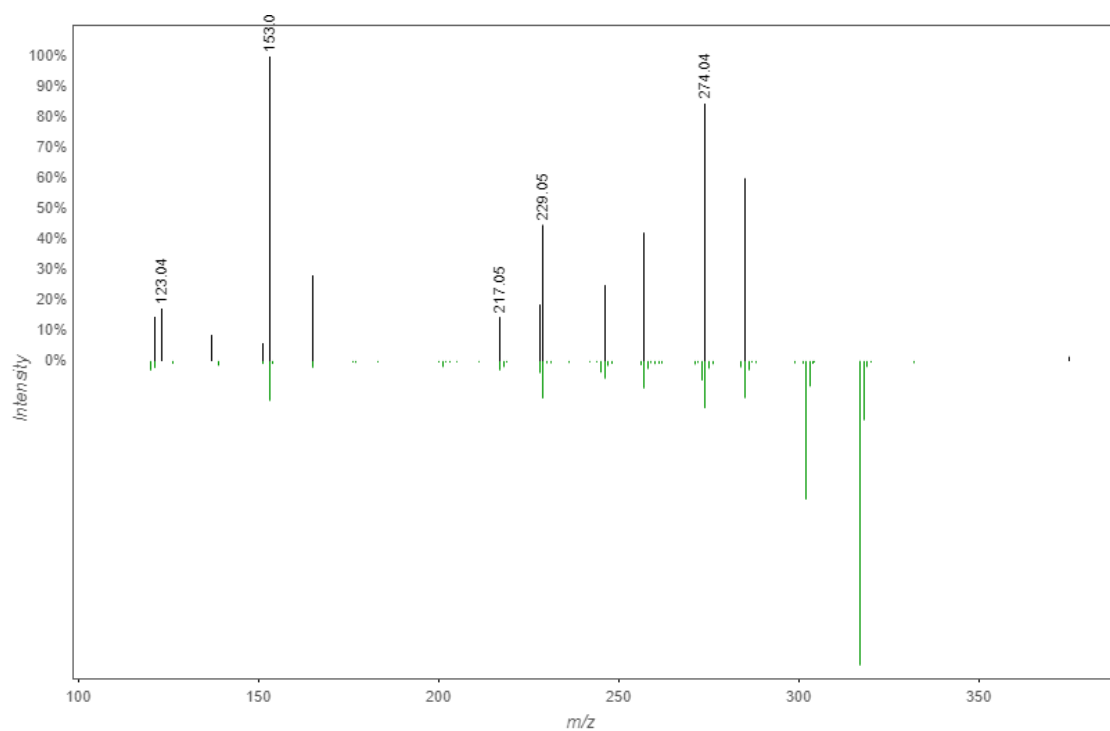

**Fig S17** MS/MS match between GNPS database (green) and *Euterpe oleracea* Mart extract (black) for **9**.

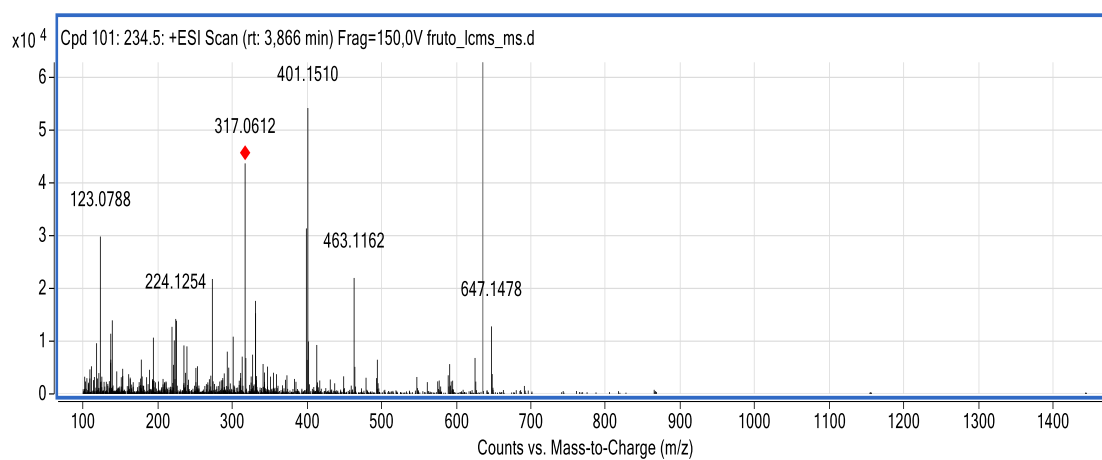

**Fig. S18.** Mass Spectrum of [M+H]<sup>+</sup> of **9**

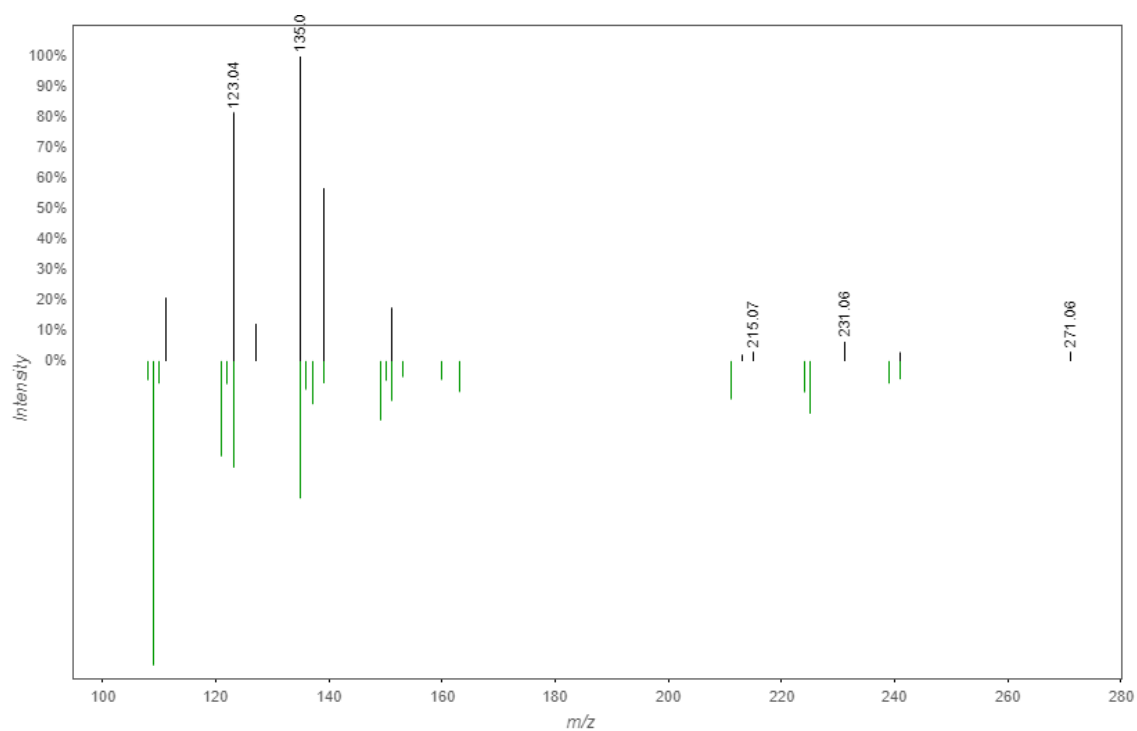

**Fig S19.** MS/MS match between GNPS database (green) and *Euterpe oleracea* Mart extract (black) for **10**.

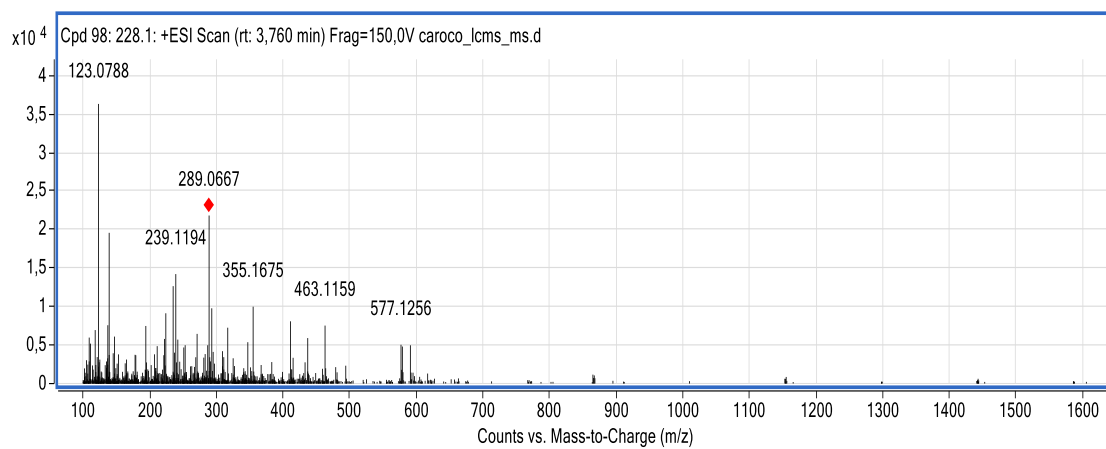

**Fig. S20.** Mass Spectrum of  $[M+H]^+$  of **10**

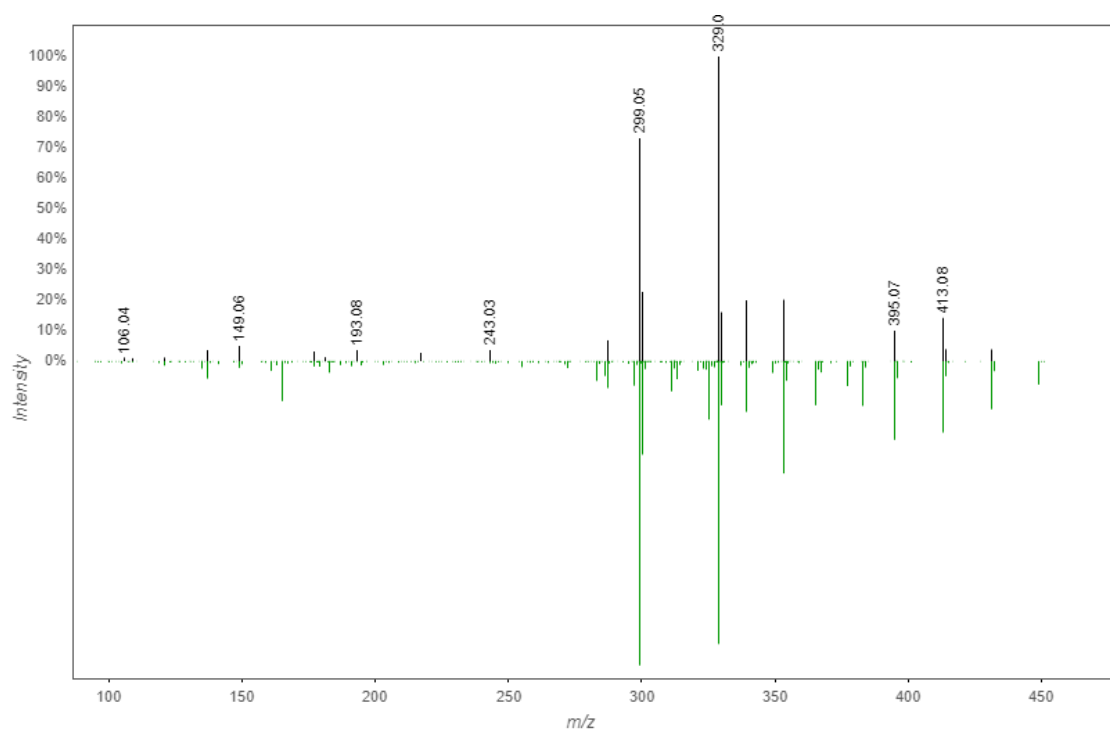

**Fig S21.** MS/MS match between GNPS database (green) and *Euterpe oleracea* Mart extract (black) for **11**.

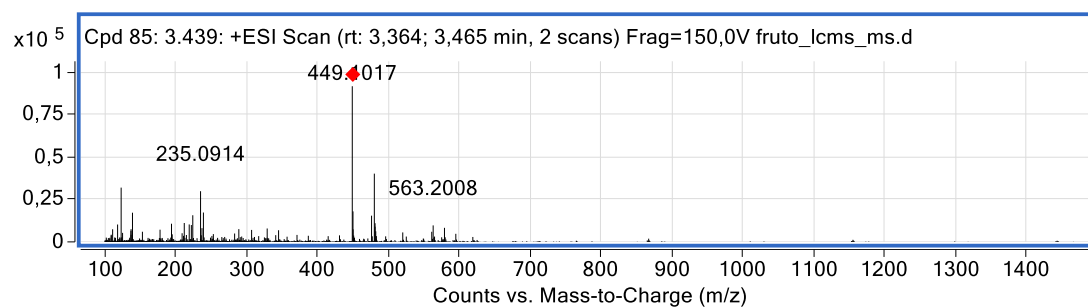

**Fig. S22.** Mass Spectrum of  $[M+H]^+$  of **11**

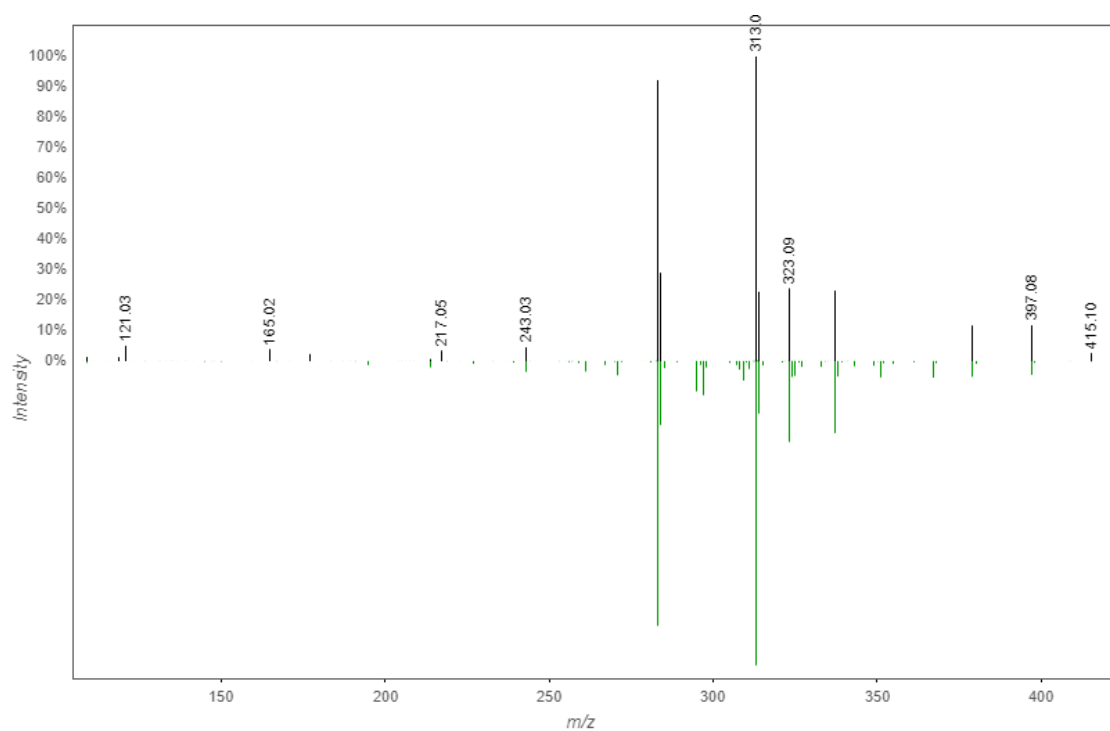

**Fig S23.** MS/MS match between GNPS database (green) and *Euterpe oleracea* Mart extract (black) for **12**.

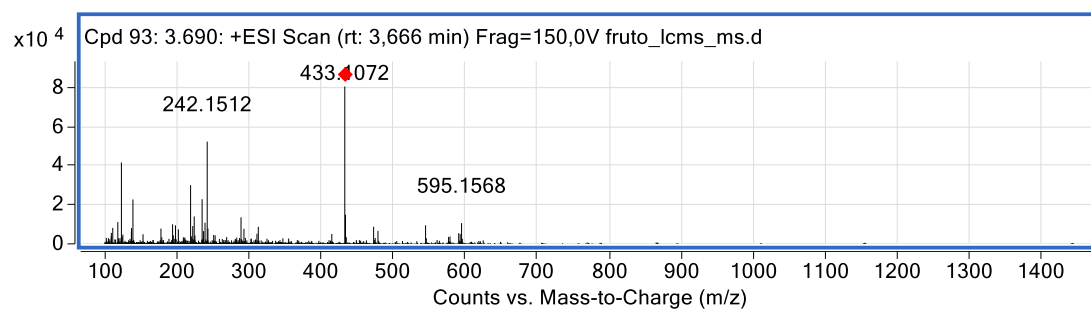

**Fig. S24.** Mass Spectrum of  $[M+H]^+$  of **12**

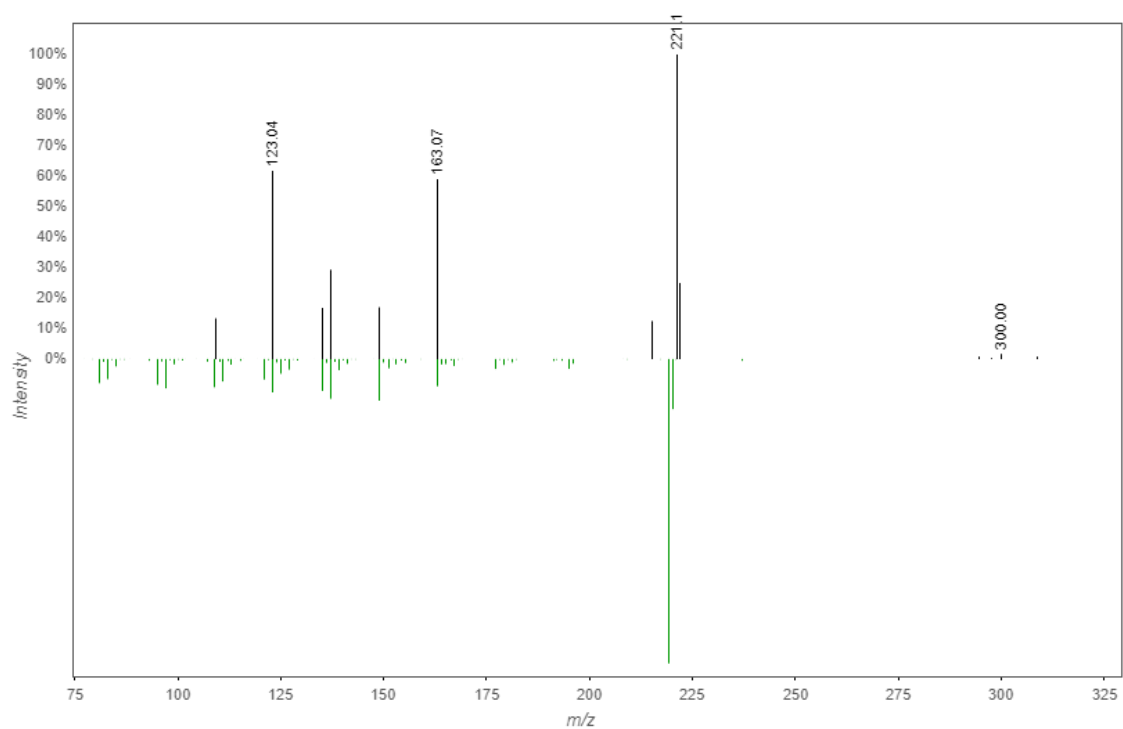

**Fig S25.** MS/MS match between GNPS database (green) and *Euterpe oleracea* Mart extract (black) for **13**

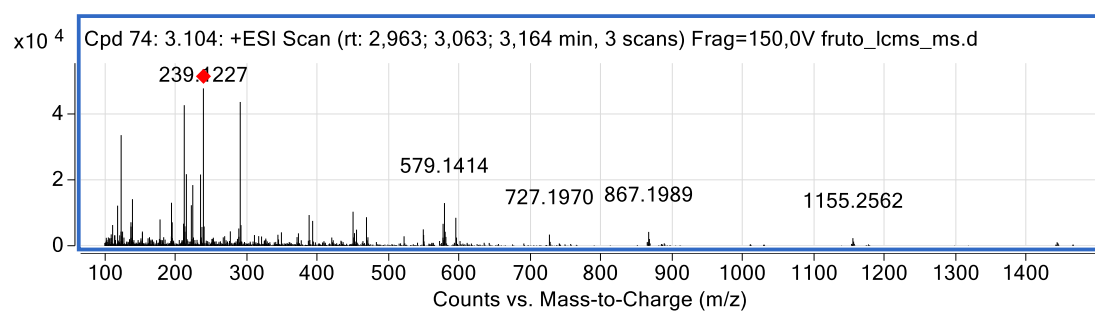

**Fig. S26.** Mass Spectrum of  $[M+H]^+$  of **13**

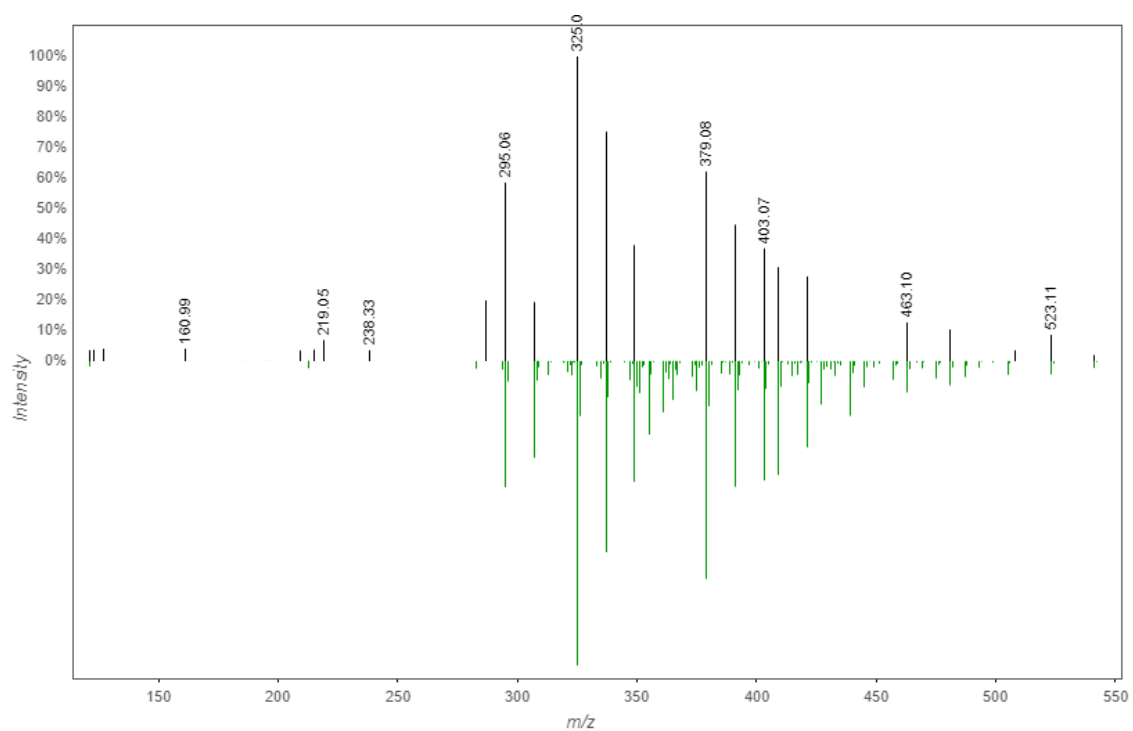

**Fig S27.** MS/MS match between GNPS database (green) and *Euterpe oleracea* Mart extract (black) for **14**

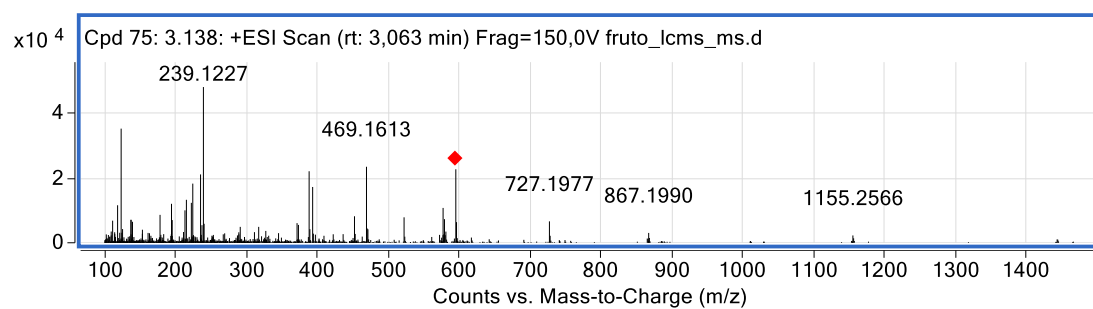

**Fig. S28.** Mass Spectrum of  $[M+H]^+$  of **14**
